# Supplementary material for: Integrating three-dimensional graphene/Fe3O4@C composite and mesoporous Co(OH)2 nanosheets arrays/graphene foam into a superior asymmetric electrochemical capacitor
Source: Royal Society of Chemistry journal article supplement (doi:10.1039/c5ra19323k), 2015-01-01
Supplement: c5ra19323k1.pdf [file c5ra19323k1.pdf]

## Electronic Supplementary Information

### **Integrating three-dimensional graphene/Fe<sub>3</sub>O<sub>4</sub>@C composite and mesoporous Co(OH)<sub>2</sub> nanosheets arrays/graphene foam into a superior asymmetric electrochemical capacitor**

Huanwen Wang,<sup>[a, b]</sup> Hui Teng Tan,<sup>[a]</sup> Huan Yi,<sup>[c]</sup> Yu Zhang,<sup>[a]</sup> Guilue Guo,<sup>[a]</sup> Xuefeng Wang,<sup>\*[c]</sup> Srinivasan Madhavi,<sup>\*[a, b]</sup> and Qingyu Yan<sup>\*[a, b]</sup>

[a] Dr. H. Wang, Dr. H. T. Tan, Dr. Y. Zhang, Dr. G. Guo, Prof S Madhavi, Prof. Q. Yan  
School of Materials Science and Engineering, Nanyang Technological University,  
Singapore 639798, Singapore  
E-mail: [alexyan@ntu.edu.sg](mailto:alexyan@ntu.edu.sg) (Q. Yan)

[b] Dr. H. Wang, Prof S Madhavi, Prof. Q. Yan  
Energy Research Institute@NTU, Nanyang Technological University, Singapore 637553,  
Singapore  
E-mail: [Madhavi@ntu.edu.sg](mailto:Madhavi@ntu.edu.sg) (S. Madhavi)

[c] Dr. H. Yi, Prof. X. Wang  
Department of Chemistry, Shanghai Key Lab of Chemical Assessment and Sustainability,  
Tongji University, Shanghai 200092, China  
E-mail: [xfwang@tongji.edu.cn](mailto:xfwang@tongji.edu.cn) (X. Wang)

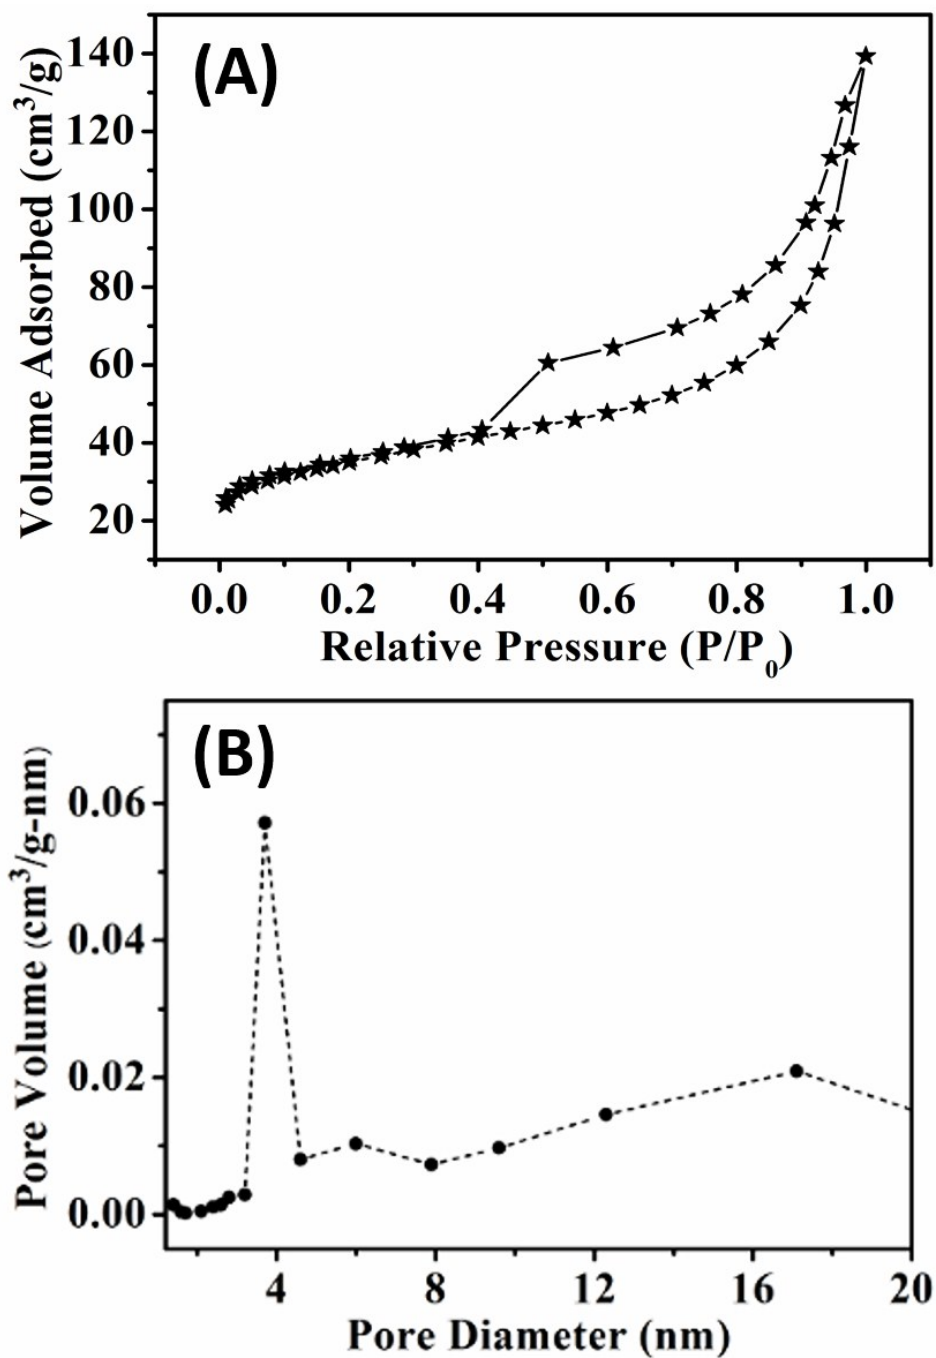

**Figure S1** Nitrogen adsorption-desorption isotherms (A) and pore size distributions (B) for graphene/Fe<sub>3</sub>O<sub>4</sub>@C composite.

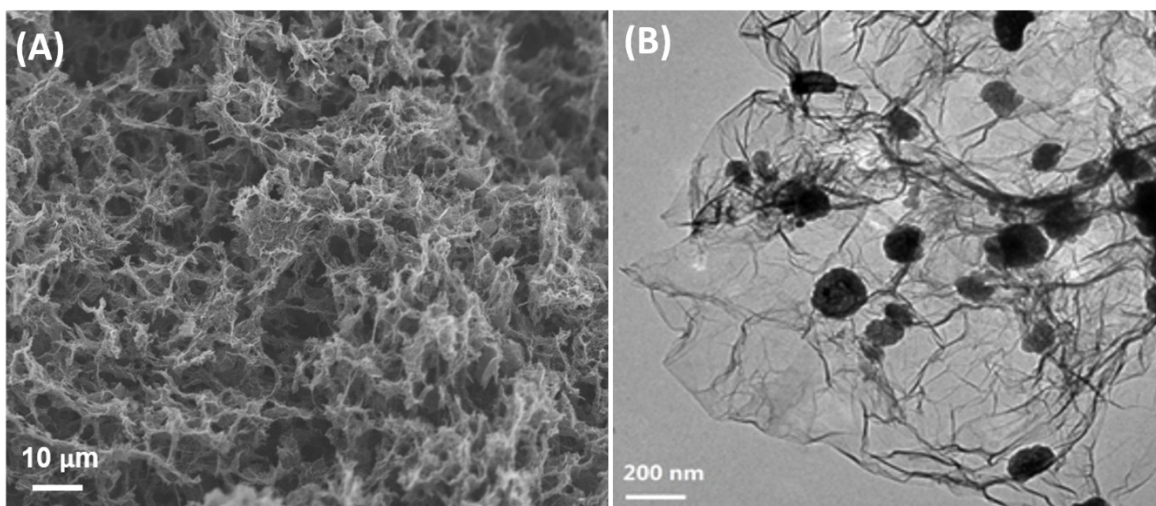

**Figure S2** FESEM and TEM images of graphene/ $\text{Fe}_3\text{O}_4$ @C composites after cycling.

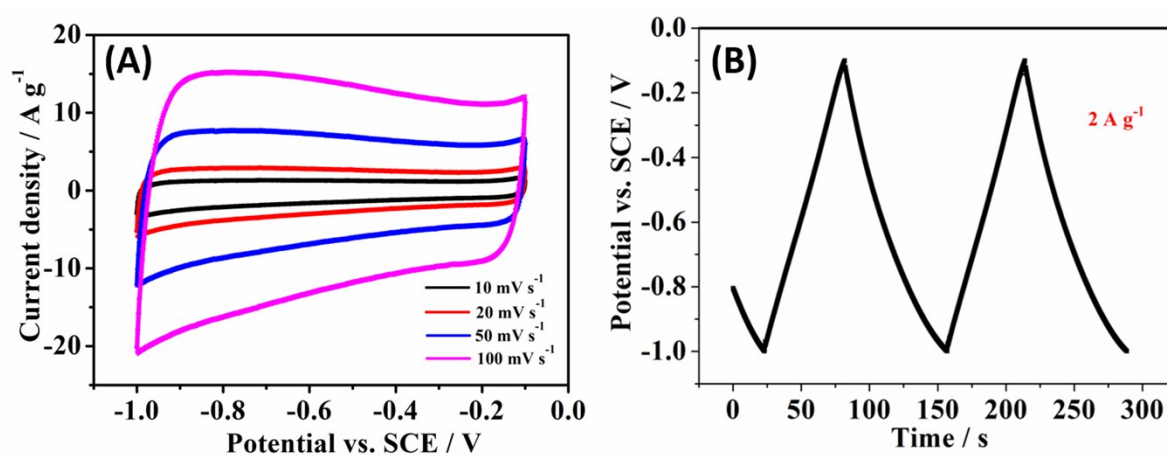

**Figure S3** Electrochemical properties of pure graphene. (A) CV curves at different scan rates.

(B) galvanostatic charge-discharge curves at  $2 \text{ A g}^{-1}$ .

**Table S1.** Specific capacitances of recently published state-of-the-art FeO<sub>x</sub>-based materials, tested in three-electrode configuration.

| FeO <sub>x</sub> electrode                         | Electrolyte                          | Potential range (V vs. SCE) | Specific capacitance (F g <sup>-1</sup> ) | Rate capability               | Ref |
|----------------------------------------------------|--------------------------------------|-----------------------------|-------------------------------------------|-------------------------------|-----|
| graphitic nanoflake/Fe <sub>3</sub> O <sub>4</sub> | 2M KOH                               | -1.2 to -0.6 V              | 299 at 0.5 A g <sup>-1</sup>              | 131 at 0.5 A g <sup>-1</sup>  | S1  |
| Fe <sub>3</sub> O <sub>4</sub> film                | 1M Na <sub>2</sub> SO <sub>4</sub>   | -0.55 to 0.05 V             | 105 at 20 mV s <sup>-1</sup>              | Not reported                  | S2  |
| Fe <sub>3</sub> O <sub>4</sub> powders             | 0.1M K <sub>2</sub> SO <sub>4</sub>  | -0.8 to 0.25 V              | 75 at 10 mV s <sup>-1</sup>               | Not reported                  | S3  |
| C-dots/Fe <sub>3</sub> O <sub>4</sub>              | 1M Na <sub>2</sub> SO <sub>3</sub>   | -1 to 0 V                   | 208 at 1 A g <sup>-1</sup>                | 80 at 20 A g <sup>-1</sup>    | S4  |
| Fe <sub>2</sub> O <sub>3</sub> nanotube            | 1M Li <sub>2</sub> SO <sub>4</sub>   | -0.8 to 0 V                 | 138 at 1.3 A g <sup>-1</sup>              | 91 at 12.8 A g <sup>-1</sup>  | S5  |
| FeOOH rods                                         | 1M Li <sub>2</sub> SO <sub>4</sub>   | -0.85 to -0.1 V             | 116 at 0.5 A g <sup>-1</sup>              | 93 at 1.5 A g <sup>-1</sup>   | S6  |
| Octadecahedron Fe <sub>3</sub> O <sub>4</sub>      | 1M Na <sub>2</sub> SO <sub>3</sub>   | -1 to 0.1 V                 | 118 at 2 A g <sup>-1</sup>                | 50 at 3.3 A g <sup>-1</sup>   | S7  |
| Fe <sub>3</sub> O <sub>4</sub> nanoparticles       | 1M Na <sub>2</sub> SO <sub>3</sub>   | -0.9 to 0.1 V               | 207.7 at 0.4 A g <sup>-1</sup>            | 90.4 at 10 A g <sup>-1</sup>  | S8  |
| Fe <sub>3</sub> O <sub>4</sub> /CNF composite      | 1M Na <sub>2</sub> SO <sub>3</sub>   | -0.9 to 0.1 V               | 127 at 10 mV s <sup>-1</sup>              | 53 at 10 mV s <sup>-1</sup>   | S9  |
| Fe <sub>3</sub> O <sub>4</sub> /CNT composite      | 6M KOH                               | -1 to 0 V                   | 129 at 2.5 mA cm <sup>-1</sup>            | 103 at 40 mA cm <sup>-1</sup> | S10 |
| Fe <sub>3</sub> O <sub>4</sub> /carbon nanosheets  | 1M Na <sub>2</sub> SO <sub>3</sub>   | -0.8 to -0.2 V              | 163.4 at 1 A g <sup>-1</sup>              | 113 at 10 A g <sup>-1</sup>   | S11 |
| Fe <sub>3</sub> O <sub>4</sub> /carbon black       | 1M Na <sub>2</sub> SO <sub>3</sub>   | -0.75 to 0.5 V              | 510 at 15 mA g <sup>-1</sup>              | Not reported                  | S12 |
| Fe <sub>2</sub> O <sub>3</sub> nanotubes/rGO       | 1M Na <sub>2</sub> SO <sub>4</sub>   | -1 to 0 V                   | 215 at 2.5 mV s <sup>-1</sup>             | 88 at 100 mV s <sup>-1</sup>  | S13 |
| FeO <sub>x</sub> /carbon foams                     | 2.5M Li <sub>2</sub> SO <sub>4</sub> | -0.8 to 0.2 V               | 343 at 5 mV s <sup>-1</sup>               | Not reported                  | S14 |
| Fe <sub>3</sub> O <sub>4</sub> particles-graphene  | 1M KOH                               | -1 to 0.1 V                 | 220.1 at 0.5 A g <sup>-1</sup>            | 134.6 at 5 A g <sup>-1</sup>  | S15 |
| FeOOH/graphene                                     | 1M LiOH                              | -1.15 to 0.1 V              | 326 at 0.5 A g <sup>-1</sup>              | 293 at 10 A g <sup>-1</sup>   | S16 |
| Au-Fe <sub>3</sub> O <sub>4</sub> nanoparticles    | 6M KOH                               | -1 to 0.4 V                 | 464 at 1 A g <sup>-1</sup>                | 120 at 10 A g <sup>-1</sup>   | S17 |
| Fe <sub>3</sub> O <sub>4</sub> -f-HEG              | 1M Na <sub>2</sub> SO <sub>4</sub>   | -0.5 to -0.5 V              | 180 at 10 mV s <sup>-1</sup>              | 160 at 100 mV s <sup>-1</sup> | S18 |

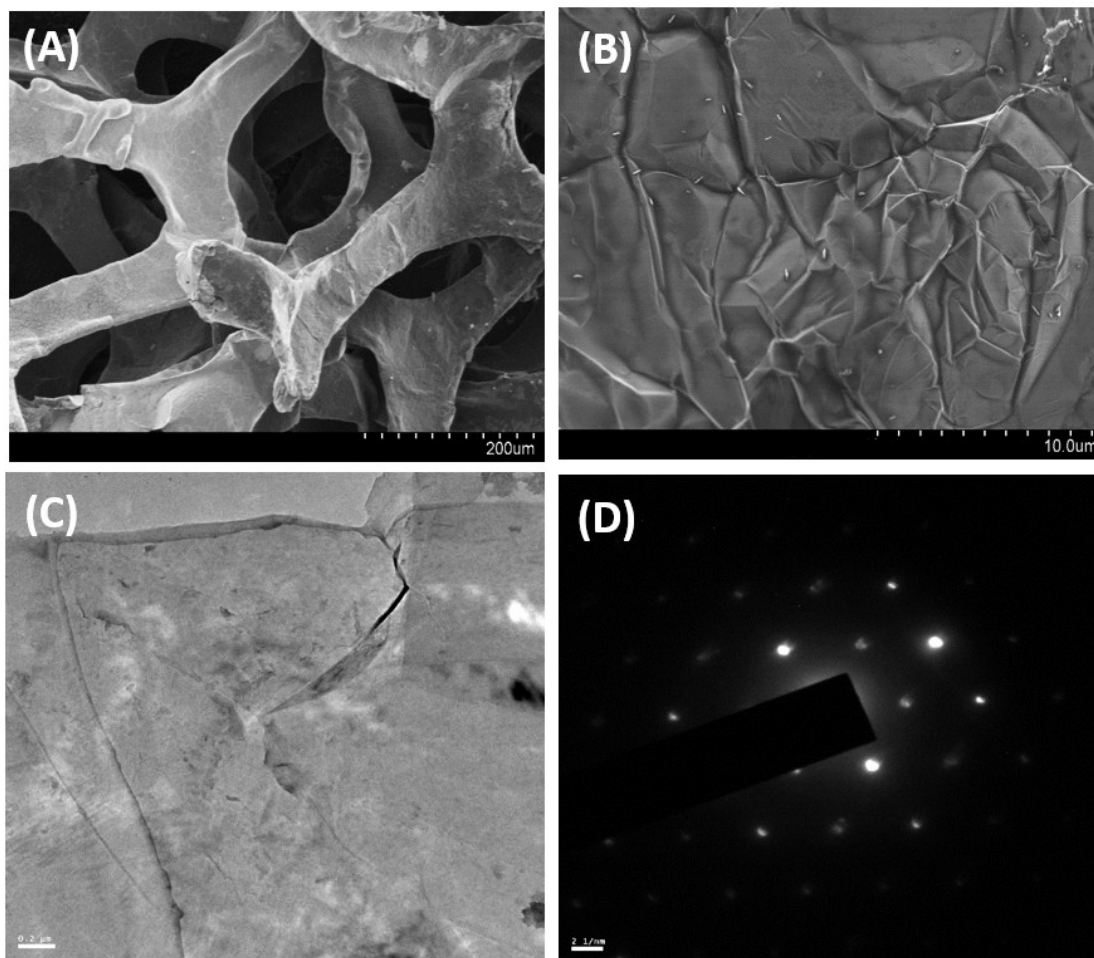

**Figure S4** FESEM images (A, B) and TEM images (C) and the SAED pattern (D) of graphene foam.



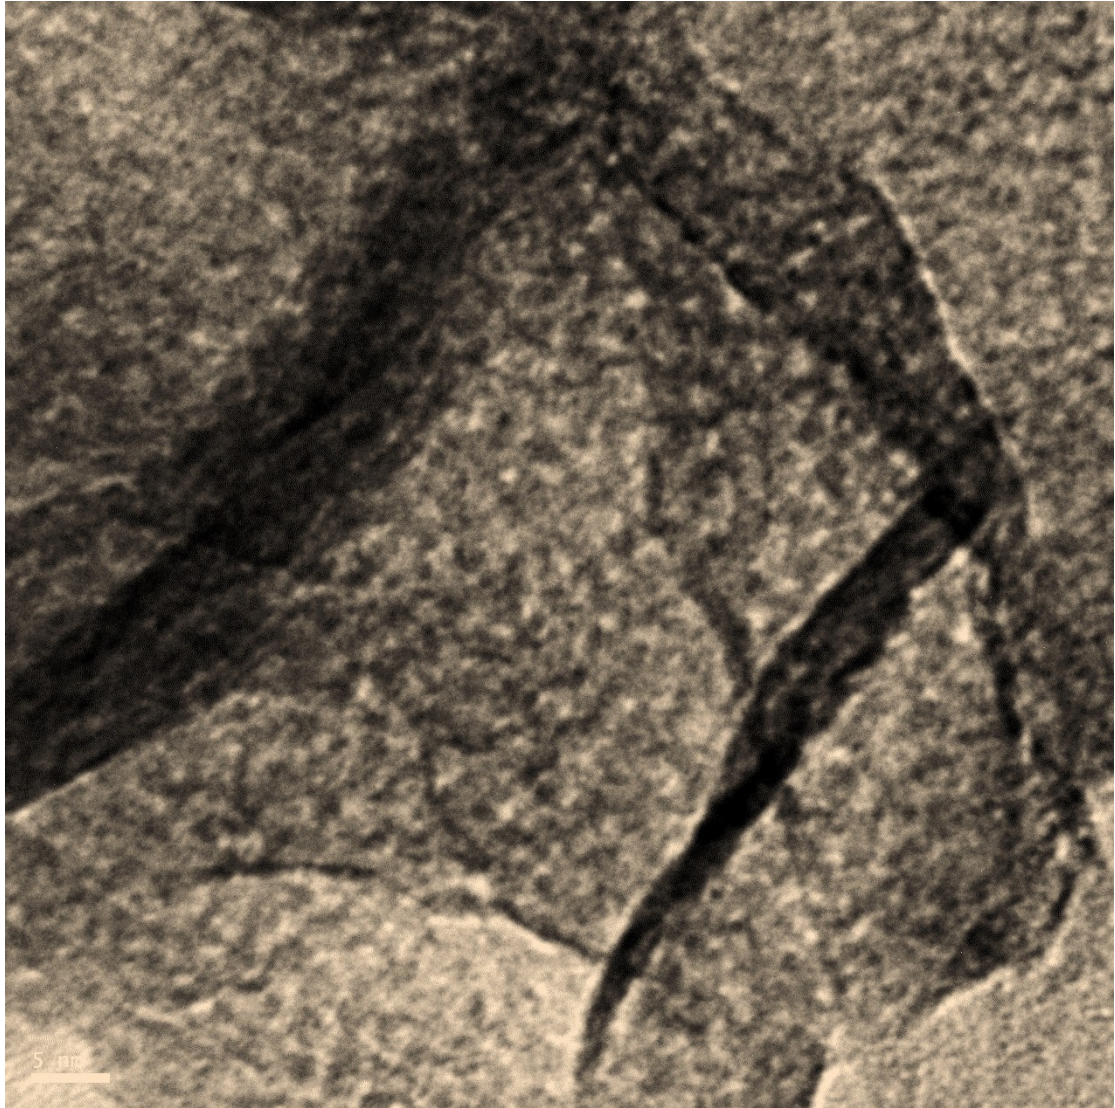

**Figure S5** The TEM image of the  $\text{Co(OH)}_2$  nanosheet on the GFs.

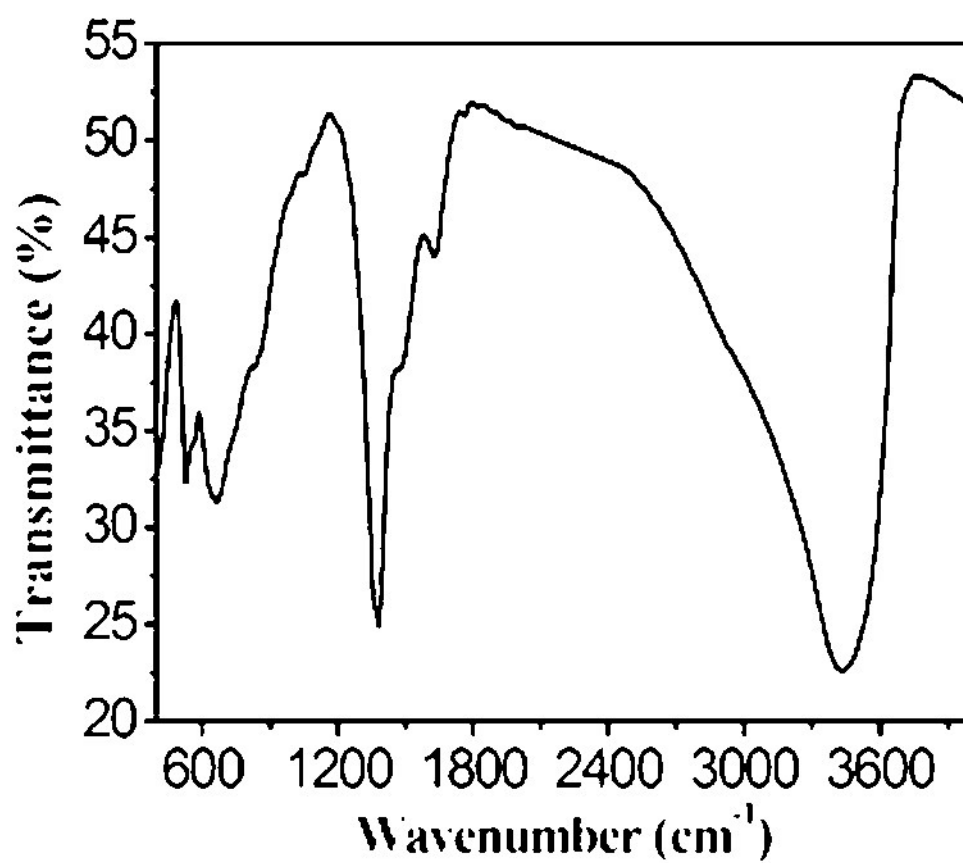

**Figure S6** FT-IR spectrum of Co(OH)<sub>2</sub> NAs/GF.

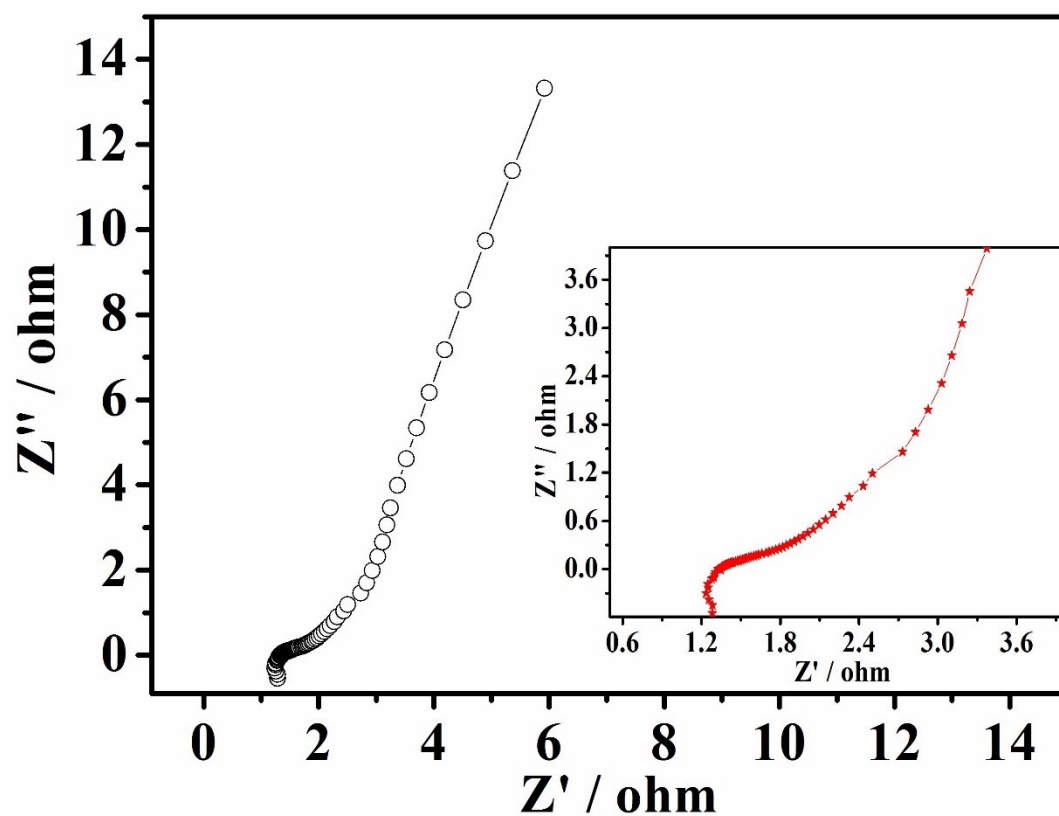

**Figure S7** Nyquist plots for the Co(OH)<sub>2</sub> NAs/GF//graphene/Fe<sub>3</sub>O<sub>4</sub>@C ASC. The frequency range is from 10<sup>-1</sup> to 10<sup>5</sup> at the bias potential of 1.4 V. The lower right inset presents high-frequency region of the plot.



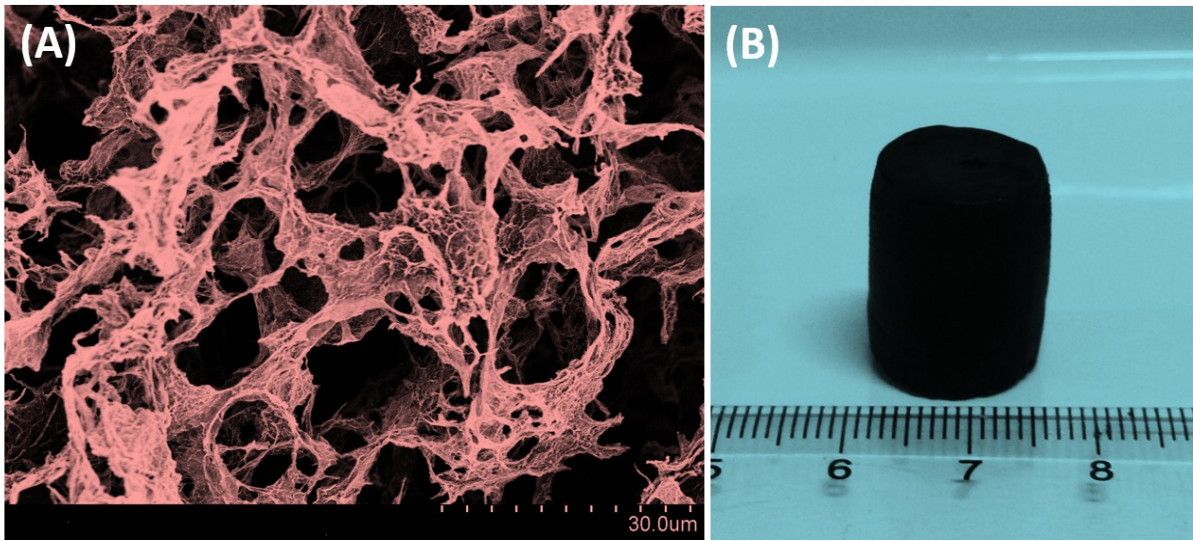

**Figure S8** the FESEM image (A) and the photograph (B) of the graphene.

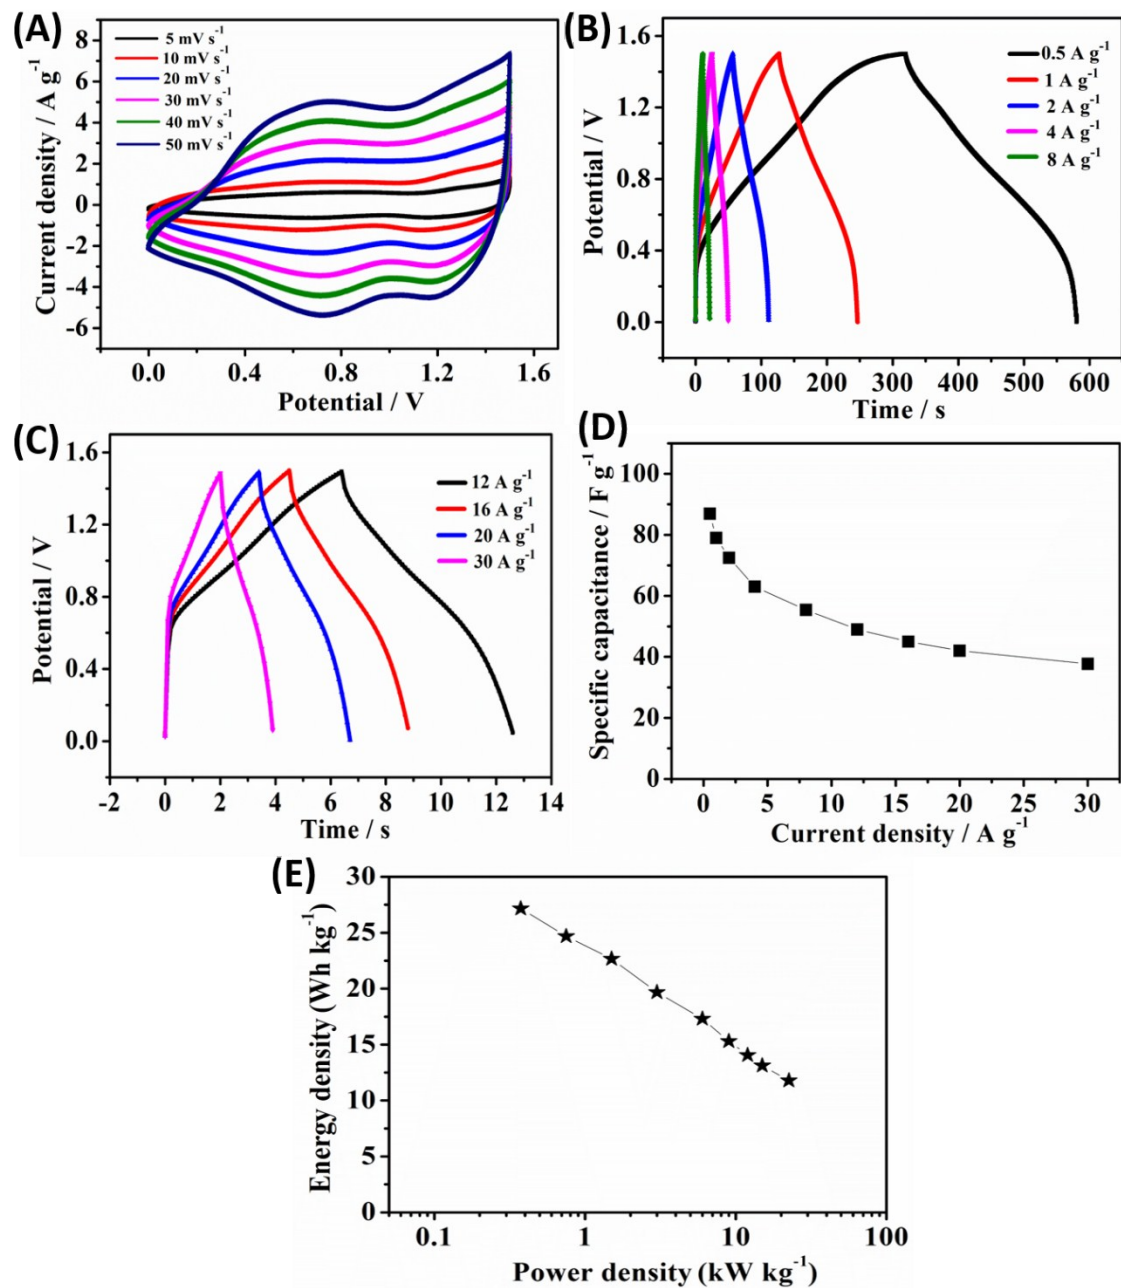

**Figure S9** Electrochemical properties of the Co(OH)<sub>2</sub> NAs/GF//graphene ASC device in 1 M KOH electrolyte. (A) CV curves at various scan rates. (B, C) GCD curves at various current densities. (D) Specific capacitances at various current densities. (E) Ragone plot.

**The specific capacitances, energy densities, and power densities can be calculated by the following equations on the basis of galvanostatic charge–discharge curves:**

$$C = \frac{I\Delta t}{m\Delta V} \quad (1)$$

$$E = \frac{1}{2 \times 3.6} CV^2 \quad (2)$$

$$P = \frac{E \times 3600}{\Delta t} \quad (3)$$

Where  $C$  ( $F\ g^{-1}$ ) is the specific capacitance,  $E$  ( $Wh\ kg^{-1}$ ) is the energy density,  $P$  ( $W\ kg^{-1}$ ) is the power density,  $I$  (A) is the discharge current,  $\Delta t$  (s) is the discharge time,  $m$  (g) is the sum mass of the active material and  $\Delta V$  (V) is the potential drop during the discharge process.

- [S1] M. Wang, W. Wang, W. Wang, X. Guo, *RSC Adv.*, 4 (2014) 39625–39633.
- [S2] K. W. Chung, K. B. Kim, S. H. Han, H. Lee, *Electrochem. Solid-State Lett.* 8 (2005) A259–A262.
- [S3] T. Brousse, D. Bélanger, *Electrochem. Solid-State Lett.* 6 (2003) A244–A248.
- [S4] P. DEB, K. Bhattacharya, *Dalton Trans.*, 44 (2015) 9221–9229.
- [S5] K. Xie, J. Li, Y. Lai, W. Lu, Z. Zhang, Y. Liu, L. Zhou, H. Huang, *Electrochem. Commun.* 13 (2011) 657–660.
- [S6] W. H. Jin, G. T. Cao, J. Y. Sun, *J. Power Sources* 175 (2008) 686–691.
- [S7] J. Chen, K. Huang, S. Liu, *Electrochim. Acta* 55 (2009) 1–5.
- [S8] L. Wang, H. Ji, S. Wang, L. Kong, X. Jiang, G. Yang, *Nanoscale* 5 (2013) 3793–3799.
- [S9] J. Mu, B. Chen, Z. Guo, M. Zhang, Z. Zhang, P. Zhang, C. Shao, Y. Liu, *Nanoscale* 3 (2011) 5034–5040.
- [S10] D. Guan, Z. Gao, W. Yang, J. Wang, Y. Yuan, B. Wang, M. Zhang, L. Liu, *Materials Science and Engineering B* 178 (2013) 736–743.
- [S11] D. Liu, X. Wang, X. Wang, W. Tian, J. Liu, C. Zhi, D. He, Y. Bandoa, D. Golberg, J. *Mater. Chem. A*, 1 (2013) 1952–1955.
- [S12] N. L. Wu, S. Y. Wang, C. Y. Han, D. S. Wu, L. S. Shiue, *J. Power Sources* 113 (2003) 173–178.
- [S13] K. K. Lee, S. Deng, H. M. Fan, S. Mhaisalkar, H. R. Tan, E. S. Tok, K. P. Loh, W. S. Chin, C. H. Sow, *Nanoscale* 4 (2012) 2958–2961.
- [S14] M. B. Sassin, A. N. Mansour, K. A. Pettigrew, D. R. Rolison, J. W. Long, *ACS Nano* 4 (2010) 4505–4514.
- [S15] Q. Wang, L. Jiao, H. Du, Y. Wang, H. Yuan, *J. Power Sources* 245 (2014) 101–106.
- [S16] Q. Qu, S. Yang, X. Feng, *Adv. Mater.* 23 (2011) 5574–5580.
- [S17] S. Liu, S. Guo, S. Sun, X. Z. You, *Nanoscale*, 7 (2015) 4890–4893.
- [S18] A. K. Mishra, S. Ramaprabhu, *J. Phys. Chem. C* 115 (2011) 14006–14013.
